# Supplementary material for: Roads affect the spatial structure of butterfly communities in grassland patches
Source: PeerJ. 2018 Aug 14;6:e5413. doi: 10.7717/peerj.5413 (PMC6097499; doi:10.7717/peerj.5413)
Supplement: Data S1 — Explanations are in the sheet “Explanations”. [file peerj-06-5413-s002.xlsx]

## Sheet: butterflies
Transect_ID	Papilio machaon	Pieris rapae	Anthocaris cardamines	Pieris brassicae	Pieris napi	Colias hyale	Gonepteryx rhamni	Callophrys rubi	Lycaena phlaeas	Lycaena virgaureae	Lycaena tityrus	Phengaris teleius	Phengaris nausithous	Celastrina argiolus	Plebeius argyrognomon	Leptidea reali	Polyommatus icarus	Polyommatus coridon	Araschnia levana	Vanessa atalanta	Inachis io	Vanessa cardui	Nymphalis antiopa	Polygonia c-album	Aglais urticae	Argynnis paphia	Argynnis aglaja	Issoria latonia	Brenthis ino	Boloria dia	Melithea athalia	Lassiomata megera	Melanargia galathea	Maniola jurtyna	Aphantopus hyperantus	Coenonympha pamphilus	Coenonympha glycerion	Pyrgus malvae	Erynnis tages	Thymelicus lineola	Thymelicus sylvestris	Ochlodes sylvanus
1	6	36	6	5	0	0	21	0	0	0	1	4	1	0	0	1	12	0	2	2	18	0	0	0	9	0	0	2	2	2	0	0	2	5	21	11	4	2	4	12	2	0
2	3	36	3	3	4	0	24	0	1	1	0	1	2	2	0	0	5	2	3	2	16	4	0	0	5	1	0	3	2	4	0	1	0	8	10	6	0	0	3	13	5	0
3	2	9	13	6	3	1	19	0	3	1	0	0	0	3	0	0	2	0	1	0	21	0	0	0	4	0	0	1	3	1	0	2	6	2	10	10	0	2	5	1	2	0
4	4	22	9	10	6	0	1	0	0	0	1	0	1	0	0	0	3	0	2	0	4	1	0	0	2	0	0	4	3	2	0	0	0	13	13	12	0	4	5	6	3	1
5	1	15	1	1	4	0	4	0	4	0	2	2	3	1	0	0	7	0	5	0	10	3	0	0	6	0	0	4	0	0	0	0	3	0	13	13	0	0	8	2	2	0
6	8	11	4	6	4	0	25	0	0	0	0	0	2	0	0	2	2	1	3	0	18	0	0	0	5	1	0	3	5	0	0	0	4	8	31	18	0	5	3	4	0	0
7	0	23	6	6	3	0	4	0	1	0	6	12	12	0	0	0	4	0	2	2	16	1	0	1	9	0	0	9	1	2	0	0	0	7	21	14	0	0	2	0	1	2
8	3	24	10	5	4	2	13	0	3	0	0	1	0	1	0	0	2	0	4	2	12	4	0	0	4	0	0	2	2	2	0	5	0	8	14	12	7	3	5	2	6	0
9	1	20	3	7	3	0	2	0	4	0	0	1	0	0	0	0	0	0	5	2	19	0	0	1	3	1	0	4	2	0	0	0	3	3	16	15	0	2	21	2	2	0
10	5	32	9	5	7	0	12	0	0	0	6	4	0	0	0	3	7	0	4	7	4	5	0	0	3	1	0	0	1	0	0	0	0	3	12	22	0	0	0	2	1	0
11	2	2	6	1	6	3	2	0	8	0	0	0	1	0	0	0	19	1	12	0	9	0	0	0	3	0	0	0	6	1	0	5	2	23	14	17	0	2	5	0	1	0
12	3	34	13	1	2	1	37	0	8	0	0	2	0	0	0	0	7	1	4	2	3	4	0	1	0	0	0	0	4	0	0	0	2	21	6	8	1	5	5	4	2	7
13	4	4	2	2	2	0	8	0	0	0	2	1	0	1	0	0	5	0	3	4	21	0	0	0	2	0	0	3	0	5	0	1	2	15	4	14	0	3	3	0	2	0
14	4	10	4	6	1	5	1	0	0	0	1	3	0	0	0	0	4	0	4	0	3	2	0	0	2	0	0	4	2	4	0	4	6	21	14	10	5	1	0	3	3	0
15	7	8	0	1	3	0	13	0	8	1	0	0	0	0	0	0	19	0	19	4	3	1	0	0	0	0	0	0	0	0	0	1	0	19	3	10	0	6	3	0	1	0
16	8	30	14	0	11	4	21	0	5	0	2	2	0	0	0	6	28	0	0	4	14	1	0	0	0	0	0	3	4	3	0	1	12	10	25	8	0	0	0	2	2	0
17	3	18	4	5	1	1	8	0	1	0	7	1	4	0	0	0	32	0	3	2	9	0	0	0	2	0	0	3	3	1	0	1	8	13	21	12	6	0	0	3	4	0
18	0	4	15	7	0	0	7	0	0	2	0	0	0	0	0	2	3	0	0	2	0	2	0	1	1	0	0	4	0	4	0	2	12	7	11	14	0	7	3	4	3	0
19	2	9	13	0	1	1	29	0	2	0	0	0	0	0	0	0	18	0	13	0	18	0	0	0	2	0	0	1	7	0	1	0	23	2	2	12	0	5	5	6	3	0
20	4	0	3	5	4	0	14	0	8	0	1	2	2	1	0	0	37	1	3	5	18	2	0	0	0	0	0	1	3	0	0	0	11	13	12	20	1	3	0	9	4	0
21	1	26	4	1	5	0	12	0	0	0	0	0	1	0	0	0	12	0	4	3	0	0	0	0	2	0	0	3	11	0	1	2	5	6	12	23	2	2	0	9	1	1
22	0	32	14	3	4	0	31	0	0	0	1	0	0	0	0	0	20	0	5	1	3	4	0	1	11	0	0	1	9	1	0	1	3	7	4	14	0	0	7	0	1	0
23	4	33	7	5	0	0	4	0	2	0	2	0	0	0	0	0	18	0	5	2	19	2	0	2	0	0	0	0	1	0	0	1	7	0	21	34	4	6	5	5	1	0
24	5	25	4	3	4	0	8	0	0	0	3	1	0	0	0	0	14	1	5	0	7	1	0	0	2	0	0	2	8	0	0	1	3	5	16	30	1	2	8	9	1	5
25	5	34	3	1	7	0	45	0	1	0	5	1	0	0	0	0	24	0	3	6	15	0	0	0	2	0	0	1	0	0	0	0	5	8	3	13	0	5	1	19	1	0
26	0	12	3	9	5	1	17	0	0	0	1	1	0	0	0	0	6	0	1	1	10	2	0	0	0	0	0	0	0	0	0	0	3	2	32	23	2	0	8	3	0	0
27	5	33	3	7	0	0	32	0	0	1	0	1	0	0	0	1	2	0	2	2	10	0	0	0	3	0	0	1	4	2	0	0	2	0	21	10	0	5	2	1	0	10
28	5	6	0	5	1	0	14	0	0	1	0	2	0	0	0	0	4	0	4	2	8	0	0	0	2	0	0	0	1	0	0	2	2	1	7	7	0	5	4	4	3	0
29	4	6	7	0	0	0	0	0	0	1	2	2	3	0	0	0	13	1	5	4	14	3	0	0	5	2	0	0	3	0	0	0	3	2	12	19	0	2	3	6	0	0
30	1	23	8	3	2	0	4	0	0	0	2	0	0	1	0	2	4	0	5	4	8	2	0	0	4	1	0	0	2	0	0	0	5	3	13	23	1	1	1	2	0	0
31	3	3	1	9	6	0	28	0	1	0	0	0	0	0	0	1	3	0	4	2	6	6	0	0	4	0	0	0	0	0	0	0	2	0	8	10	0	0	0	6	0	10
32	4	20	4	9	0	0	2	0	0	1	0	0	0	0	0	0	13	0	2	0	3	0	0	0	3	0	0	0	0	0	0	0	3	3	3	15	0	2	4	0	0	0
33	1	14	4	10	9	0	9	0	0	0	2	1	1	0	0	0	5	0	2	0	10	0	0	0	3	1	0	0	0	0	0	2	6	2	12	25	2	3	7	1	0	2
34	1	11	1	6	0	3	0	0	0	0	2	7	2	0	0	0	3	0	2	0	19	2	0	0	2	2	0	2	5	0	0	5	0	1	4	17	2	4	0	2	1	0
35	2	4	3	5	1	0	0	0	2	1	1	0	0	0	0	0	14	0	0	6	16	10	0	0	0	0	0	0	1	3	0	0	5	3	6	25	2	2	0	4	0	0
36	1	23	14	7	4	3	15	0	0	1	0	10	0	0	0	10	2	0	3	0	7	0	0	1	2	0	0	5	2	5	0	2	3	0	21	26	5	0	8	5	0	0
37	2	19	11	1	1	1	12	0	6	0	4	2	4	0	0	0	1	0	2	0	3	4	0	0	0	0	0	0	5	0	0	0	5	5	2	12	0	2	3	12	0	3
38	0	31	1	2	0	0	44	0	12	0	3	2	0	0	0	0	4	0	4	0	16	1	0	0	0	0	0	0	0	0	0	0	3	0	7	5	0	3	5	8	0	2
39	7	1	0	1	7	0	14	0	0	0	0	0	0	0	0	0	2	1	0	0	11	6	0	1	0	0	0	0	4	1	1	0	0	2	2	11	1	2	0	7	0	0
40	5	30	9	6	3	4	2	0	1	0	0	1	12	3	0	0	7	0	2	0	9	1	0	0	0	0	0	0	5	2	0	0	3	3	1	4	0	3	0	12	1	0
41	5	10	15	5	5	0	7	0	6	0	1	1	6	1	0	0	6	1	4	6	12	0	0	2	0	0	0	0	2	0	0	2	3	0	2	21	0	0	6	2	0	0
42	1	32	0	6	0	0	0	0	0	1	1	12	6	0	0	0	7	0	0	0	6	1	0	1	2	0	0	0	4	3	0	0	6	10	7	16	1	0	4	4	0	4
43	0	27	11	0	0	0	18	0	1	0	4	0	0	0	0	1	7	0	0	0	10	1	0	1	0	0	0	0	7	5	0	0	0	0	10	3	0	4	0	4	0	0
44	0	15	2	8	2	0	6	0	2	1	0	0	1	0	0	0	17	0	2	1	15	0	0	1	1	0	0	1	1	11	0	0	6	2	0	1	2	0	6	7	0	4
45	4	29	8	1	4	0	33	0	2	2	1	0	0	1	0	0	7	0	7	2	3	0	0	0	1	0	0	1	2	7	0	2	1	2	2	12	0	1	0	3	0	0
46	0	13	2	9	1	2	27	0	3	0	2	1	0	0	0	0	12	0	0	0	19	0	0	1	1	0	0	0	6	9	0	2	4	3	1	11	1	0	0	0	2	0
47	1	20	5	2	1	1	24	0	0	0	0	3	1	0	0	1	9	0	3	4	3	1	0	0	1	0	0	1	1	1	0	1	2	4	6	12	1	2	2	0	1	0
48	3	1	2	7	7	4	9	0	7	0	2	0	0	0	0	0	3	0	2	3	20	2	0	2	8	0	0	3	0	3	1	3	0	0	1	15	0	3	0	2	2	4
49	0	1	5	1	6	0	10	0	0	1	0	0	0	0	0	1	2	0	0	0	21	0	0	0	5	0	0	2	6	5	1	2	2	3	3	2	0	3	9	0	1	0
50	0	26	15	4	2	3	0	0	3	0	0	1	2	0	0	0	6	0	0	0	17	1	0	0	4	0	0	0	4	0	0	0	1	4	0	10	1	0	2	0	2	0
100	1	14	7	8	4	0	8	1	0	0	0	13	4	0	0	0	40	1	4	0	3	0	0	0	17	0	2	8	3	2	1	3	0	6	12	53	2	0	0	1	1	1
101	3	0	0	5	6	1	64	0	1	0	0	0	0	0	1	1	3	0	4	2	2	6	0	0	4	0	1	0	0	0	0	0	2	0	0	10	0	0	0	20	0	10
102	5	3	14	2	7	0	0	0	6	1	0	2	6	1	0	0	7	1	4	6	1	0	0	0	0	0	0	0	6	0	0	0	0	0	2	0	0	0	6	0	0	0
103	3	19	5	0	0	0	1	4	4	2	1	0	0	0	0	0	0	5	5	0	5	0	0	0	3	0	0	1	0	1	0	5	2	2	5	2	0	0	5	0	1	0
104	6	22	1	2	15	3	0	3	0	2	1	4	1	0	5	1	12	7	2	2	4	0	0	1	9	0	0	2	1	2	0	4	0	0	24	11	4	0	4	12	0	0
105	10	17	5	6	20	0	3	0	3	0	5	0	0	3	0	0	0	0	1	0	4	0	1	0	12	0	0	1	0	1	0	2	1	0	13	10	0	2	5	0	0	0
106	5	22	6	0	2	0	5	0	0	1	0	0	0	1	0	0	0	0	12	17	10	0	0	0	20	2	0	14	0	5	0	4	0	4	4	14	0	3	3	2	2	0
107	5	40	1	1	0	3	5	3	0	0	4	0	0	0	0	1	23	0	0	4	0	0	1	0	0	0	0	0	0	12	0	0	0	15	15	0	0	2	0	4	4	0
108	2	32	7	5	0	2	12	0	0	0	1	0	0	0	0	0	18	0	5	12	0	0	0	1	0	0	0	0	1	0	0	0	3	0	24	34	4	6	5	0	0	0
109	10	5	0	0	9	0	0	0	15	3	0	1	1	0	0	0	1	0	5	4	21	0	1	0	17	0	1	7	1	2	0	3	6	45	12	25	2	2	7	14	8	2
110	3	39	12	3	4	1	0	1	0	1	0	1	2	2	2	0	0	1	3	2	1	4	0	0	5	2	0	20	0	4	0	0	0	0	1	11	0	0	3	13	7	0
111	0	13	11	19	0	0	2	0	0	0	1	0	0	0	0	0	0	0	5	1	0	4	0	0	5	2	0	1	0	2	0	0	3	7	4	14	0	0	7	0	1	0
112	9	28	0	4	18	5	0	0	8	0	0	0	0	0	0	0	7	1	4	0	0	4	0	0	0	0	0	0	0	0	0	0	0	21	6	2	1	5	5	4	2	7
113	4	2	9	4	0	0	0	0	0	0	0	0	0	0	0	0	13	0	0	0	0	0	0	0	12	0	0	0	0	0	0	0	3	0	3	21	0	2	4	4	1	0
114	2	2	9	2	15	0	2	0	0	0	1	1	6	0	0	0	2	0	0	0	0	7	0	1	22	1	0	10	1	10	0	10	6	12	12	22	1	0	4	0	0	4
115	4	27	7	0	6	0	0	5	3	0	0	0	1	0	4	0	0	0	2	0	0	1	0	0	13	0	0	17	0	3	0	3	0	13	13	12	0	4	5	6	3	1
116	5	14	13	13	10	4	5	0	0	0	3	0	0	0	0	0	14	0	5	0	16	0	0	0	0	0	0	0	0	0	0	0	10	14	16	36	1	0	8	12	2	5
117	4	0	2	8	6	5	5	0	8	0	6	0	0	0	0	0	0	0	4	0	12	2	0	0	0	0	0	4	0	4	0	4	1	21	14	14	5	1	0	3	3	0
118	1	3	0	2	0	0	3	0	0	0	6	7	2	0	0	0	2	0	2	0	0	0	0	0	2	0	0	2	1	2	0	5	0	1	1	7	2	2	0	0	1	0
119	0	9	0	5	2	0	1	5	7	0	0	0	1	0	0	0	7	0	0	0	2	0	1	0	1	0	0	1	1	1	0	14	6	0	0	1	2	1	6	0	0	4
120	4	26	12	3	2	3	1	6	0	0	1	0	0	1	1	0	8	0	7	12	0	0	0	0	1	0	1	1	0	1	0	1	1	0	2	12	0	1	0	24	0	0
121	7	0	0	5	0	6	5	5	8	0	0	0	0	0	0	0	19	1	3	4	0	1	0	1	0	0	0	0	0	0	0	0	0	19	8	18	0	6	3	0	1	0
122	0	2	14	15	7	0	0	1	1	4	0	0	0	0	0	0	3	0	3	6	0	0	0	0	2	2	0	1	0	0	0	0	5	8	3	13	0	5	1	5	5	0
123	9	10	13	0	4	0	3	0	13	0	6	1	13	1	0	0	7	2	4	0	0	5	0	0	6	0	0	2	0	2	0	7	2	0	24	11	0	0	8	2	2	0
124	2	3	0	0	0	0	0	1	0	0	0	0	0	0	0	0	22	0	0	6	3	0	0	0	0	0	0	0	0	13	0	0	5	10	6	25	2	2	0	4	7	0
125	8	15	6	5	15	0	0	3	0	0	0	0	2	0	1	2	2	1	3	0	0	0	0	0	0	1	0	8	5	0	0	5	0	8	8	18	0	5	3	4	0	0
126	0	1	12	5	12	0	1	0	3	0	0	1	0	0	0	0	12	1	0	0	3	0	1	1	1	1	0	15	0	9	0	6	0	0	1	1	1	0	0	0	0	0
127	8	5	15	14	17	0	5	0	5	0	4	2	0	0	0	6	28	1	0	0	16	0	0	0	21	2	0	3	0	3	0	2	7	10	11	2	0	0	0	1	1	0
128	0	36	13	2	16	6	4	1	0	0	0	0	0	0	0	10	2	1	3	0	0	0	0	0	18	1	0	5	0	5	0	5	0	0	24	73	5	0	8	5	5	0
129	0	1	4	11	5	2	43	0	0	0	5	0	0	0	1	0	6	0	12	0	8	0	0	0	0	0	0	0	0	0	8	0	3	16	35	45	2	0	8	0	0	0
130	5	17	4	0	4	2	4	3	0	1	0	0	0	1	0	0	0	0	4	2	0	4	0	0	0	2	0	2	0	1	0	5	0	8	14	12	7	3	5	4	12	0
131	1	25	5	2	1	5	0	3	0	0	0	0	1	0	0	1	9	0	3	4	0	0	0	0	1	0	0	1	0	1	0	1	0	4	6	3	1	2	2	0	1	0
132	5	6	2	14	0	0	5	0	0	0	0	0	0	0	0	12	1	0	0	5	24	2	1	0	4	0	0	4	0	4	0	1	4	7	4	14	0	7	3	17	6	0
133	8	45	6	2	0	0	0	0	3	0	4	7	4	0	0	0	2	0	0	0	0	4	2	0	0	0	0	0	0	0	0	0	5	0	2	12	0	5	3	0	0	3
134	1	14	3	7	1	0	1	0	0	0	0	0	0	0	0	12	1	0	14	6	0	0	0	0	11	0	0	2	0	2	0	2	7	1	3	13	0	5	4	3	3	0
135	1	15	14	2	7	0	0	0	7	0	0	0	0	0	0	0	2	0	2	21	0	0	0	0	8	0	0	3	1	3	1	3	0	0	1	0	0	3	0	2	2	4
136	9	4	9	0	20	0	0	0	1	0	6	3	12	0	4	0	0	0	2	2	0	1	0	1	9	0	0	9	2	1	0	6	0	7	21	11	0	0	2	0	1	2
137	3	35	2	0	15	0	0	3	1	0	7	4	4	0	0	0	40	0	3	0	3	0	0	0	1	0	0	3	5	3	0	3	2	13	23	12	6	0	0	0	13	0
138	4	7	14	2	3	6	3	0	1	0	0	7	12	3	0	0	7	0	0	0	0	0	0	0	0	0	0	0	12	2	0	0	0	0	0	0	0	3	0	3	1	0
139	1	2	8	27	6	0	35	1	0	7	0	0	0	0	1	1	2	0	2	0	0	0	0	0	7	1	0	1	0	2	0	0	3	0	0	10	0	5	2	1	3	10
140	0	6	8	1	2	3	0	0	3	0	0	0	2	0	0	0	6	0	0	0	15	0	0	0	0	0	0	0	0	0	0	0	1	0	0	10	1	0	2	0	0	0
141	0	13	13	13	18	0	4	0	0	0	0	0	0	0	0	0	0	6	5	2	1	0	0	1	0	0	0	7	0	1	0	2	0	0	1	11	0	2	21	0	15	0
142	1	9	12	1	0	6	0	0	0	0	0	0	0	0	0	0	18	0	1	0	0	0	0	0	1	0	0	0	0	0	1	0	23	2	2	12	0	5	5	24	18	0
143	7	12	9	1	10	0	3	0	0	0	4	0	0	0	0	0	2	1	0	8	7	6	0	1	0	0	0	1	0	1	1	6	0	2	2	10	1	0	0	5	0	0
144	4	2	9	14	0	0	15	0	1	3	4	2	3	0	0	0	13	1	5	4	0	3	0	0	11	0	0	7	3	6	4	0	10	21	21	31	0	2	3	13	2	0
145	2	17	12	6	13	0	0	2	0	0	0	0	0	0	0	0	2	2	0	0	18	7	0	0	5	0	0	2	0	5	1	6	0	3	3	2	0	5	9	0	0	0
146	6	31	3	7	7	0	3	2	0	0	4	4	5	0	0	3	7	1	2	7	0	5	0	0	0	0	0	0	13	0	0	7	0	3	12	22	0	0	0	4	1	0
147	4	32	5	3	0	0	6	1	0	0	7	0	0	1	0	0	35	0	3	0	0	5	0	0	0	0	0	0	0	0	0	0	2	19	20	40	1	3	0	14	4	0
148	5	26	1	0	0	0	0	2	4	0	3	0	0	0	0	0	1	0	0	7	0	0	0	0	0	0	0	0	0	0	0	0	3	0	0	0	0	2	5	2	2	2
149	0	0	5	20	19	5	0	1	0	2	6	0	0	1	0	0	0	0	5	4	11	8	0	0	4	0	0	0	0	0	0	0	12	13	13	23	1	1	1	3	3	0

## Sheet: plants
Transect_ID	Plantago lanceolata	Plantago major	Melandrium album	Geranium palustre	Geranium pratense	Artemisia vulgaris	Centaurea jacea	Allium rotundum	Angelica sylvestris	Hypericum maculatum	Hypericum perforatum	Campanula trachelium	Campanula patula	Lychnis flos-cuculi	Gentiana pneumonanthe	Lathyrus pratensis	Ranunculus acris	Rubus caesius	Torilis japonica	Holcus mollis	Holcus lanatus	Lotus uliginosus	Lotus corniculatus	Trifolium repens	Trifolium hybridum	Trifolium pratense	Iris pseudacorus	Festuca pratensis	Valeriana officinalis	Lythrum salicaria	Achillea pannonica	Achillea millefolium	Sanguisorba officinalis	Geum rivale	Dactylis glomerata	Daucus carota	Taraxacum officinale	Myosotis arvensis	Cirsium arvense	Cirsium rivulare	Cirsium oleraceum	Elymus repens	Potentilla anserina	Potentilla erecta	Potentilla reptans	Aegopodium podagraria	Tussilago farfara	Urtica dioica	Galeopsis tetrahit
1	0	1	0	0	0	0	0	0	0	0	0	1	1	0	0	0	0	0	10	10	0	0	0	1	1	0	1	0	0	0	0	0	0	0	0	0	0	0	0	0	0	20	0	1	0	0	1	0	0
2	0	0	0	0	0	0	0	0	0	0	0	0	0	0	0	0	0	0	1	1	0	0	1	0	10	0	0	0	0	0	0	0	0	0	5	0	0	1	0	0	0	1	0	0	0	0	0	0	1
3	0	0	0	0	0	0	0	0	0	10	0	10	0	0	0	0	0	0	0	0	0	0	0	0	0	0	0	0	0	0	0	0	0	0	0	0	0	0	0	0	0	0	1	0	0	0	0	0	0
4	0	0	0	0	0	0	0	0	0	5	0	5	0	0	0	0	10	0	0	1	0	0	1	10	0	0	0	5	0	0	0	0	0	0	0	0	0	0	0	0	0	1	0	0	0	0	1	0	0
5	0	0	0	0	0	0	10	0	0	5	0	0	0	0	1	0	0	0	0	0	0	0	0	0	0	0	0	1	0	0	0	0	0	0	0	0	15	0	0	0	0	1	0	1	0	0	1	0	0
6	0	0	0	0	1	0	0	0	0	0	0	0	0	0	0	0	6	0	0	10	0	0	0	0	0	0	0	0	0	0	0	0	10	0	10	0	11	0	0	1	1	5	0	0	0	0	0	0	0
7	0	0	0	0	15	0	0	0	0	0	0	0	0	0	0	1	0	0	0	0	0	0	0	0	0	0	0	20	0	0	0	0	0	0	0	0	1	0	0	10	0	0	0	0	0	10	0	0	0
8	0	0	0	10	0	0	0	0	0	0	0	1	0	0	1	6	1	0	0	10	0	0	0	0	0	0	0	40	1	10	0	0	0	0	5	0	6	0	0	10	0	0	0	0	0	0	0	0	0
9	0	0	0	0	0	0	0	0	0	0	0	1	0	0	0	6	6	0	0	6	0	0	0	0	0	0	0	0	0	10	0	0	10	0	5	0	0	0	5	30	1	0	0	0	0	0	0	0	0
10	0	0	0	0	0	0	0	0	0	0	0	0	0	0	0	10	1	0	0	0	0	0	0	0	0	0	0	0	0	6	0	0	0	0	0	0	5	0	1	10	0	0	0	0	0	0	0	0	0
11	0	0	0	1	15	0	0	0	0	0	0	0	0	0	0	1	0	0	0	0	0	0	0	0	0	0	0	1	0	0	0	0	0	1	5	5	15	0	5	1	0	0	0	0	0	0	0	0	0
12	0	0	0	1	0	0	0	0	0	0	0	0	0	0	0	6	0	0	0	0	0	0	0	0	0	0	0	0	0	10	0	0	30	1	5	0	5	0	5	30	0	0	0	0	0	0	0	0	0
13	0	0	0	10	0	0	0	0	0	0	0	0	0	0	0	6	0	0	0	0	0	0	0	0	0	0	0	1	0	0	0	0	40	0	1	0	1	0	10	0	0	0	0	0	0	0	0	0	0
14	0	0	0	10	0	0	0	0	0	0	0	0	0	0	0	5	0	0	0	0	0	0	0	0	0	0	0	0	0	1	0	0	10	0	5	0	10	0	0	0	0	0	0	0	0	0	5	0	0
15	0	0	0	0	0	0	0	0	0	0	0	0	0	0	0	0	0	0	0	0	0	0	0	0	0	0	0	0	0	10	0	0	1	0	0	0	5	0	5	25	0	0	0	0	0	0	0	0	0
16	0	0	0	5	0	0	0	0	0	0	0	0	0	0	0	1	1	0	0	0	0	0	6	0	0	0	0	10	1	0	0	0	5	0	5	0	10	1	5	0	0	10	0	0	10	0	1	0	0
17	0	0	0	1	0	0	0	0	0	0	0	0	1	0	0	10	0	0	0	0	5	0	0	0	0	0	0	40	1	0	0	0	10	0	0	0	0	0	5	0	0	0	0	0	0	0	0	0	0
18	0	0	0	0	25	0	15	0	0	0	0	0	0	0	0	0	0	0	0	15	0	0	0	0	0	0	0	40	10	0	0	1	30	0	0	5	0	0	1	0	0	30	0	10	6	0	0	10	0
19	0	0	0	0	0	0	0	0	0	0	0	0	0	1	0	0	0	0	0	10	0	0	0	0	0	0	0	0	1	0	0	0	20	0	0	0	0	1	0	0	0	20	0	0	0	0	0	0	0
20	0	0	0	0	0	0	0	0	0	0	0	0	0	10	0	10	0	0	0	1	0	0	0	0	0	0	0	5	50	0	0	0	30	0	0	0	0	1	0	10	0	1	0	0	0	0	0	0	0
21	0	0	0	0	0	0	0	0	0	0	0	10	0	0	0	0	0	0	0	0	0	0	0	0	0	0	0	0	0	10	0	0	10	0	5	0	5	1	0	0	0	0	0	0	0	0	1	0	0
22	0	0	1	0	0	0	5	0	0	0	0	1	0	1	1	0	0	0	0	0	5	0	0	0	0	0	0	0	0	0	0	0	30	0	0	0	25	6	5	0	0	0	0	0	0	0	0	0	0
23	0	0	0	0	0	0	0	0	0	0	0	0	10	0	0	0	0	0	0	0	0	1	0	0	0	1	0	0	0	1	0	0	30	0	10	1	1	0	1	0	0	40	0	0	0	0	0	0	0
24	0	0	10	0	0	0	0	0	1	0	0	0	0	1	10	0	0	0	0	0	10	0	0	0	0	10	0	5	0	1	0	0	6	0	0	0	10	1	0	0	0	10	0	0	0	0	0	0	0
25	0	0	0	0	0	0	0	0	0	0	0	1	1	0	0	0	0	0	0	0	0	0	0	0	0	10	0	5	0	0	0	0	30	0	0	1	0	0	5	0	0	0	0	0	0	0	0	0	0
26	0	0	0	0	10	0	1	0	0	0	0	0	0	0	0	0	0	0	0	0	0	0	0	0	0	0	0	5	0	10	0	0	0	0	0	0	25	0	5	0	0	0	0	0	10	0	0	0	0
27	0	0	0	0	10	0	10	0	0	0	0	0	0	0	0	0	1	0	0	0	0	0	0	0	0	0	0	0	0	0	0	0	0	0	0	0	1	0	10	0	1	0	0	0	0	0	0	0	0
28	0	0	0	0	10	0	0	0	0	0	0	0	1	0	0	0	0	0	0	0	15	0	0	0	0	0	0	0	0	1	0	0	10	0	0	0	0	0	5	0	0	0	0	0	0	0	0	0	0
29	0	0	0	0	0	0	0	0	0	0	0	0	10	0	0	0	0	0	0	0	10	0	0	0	0	0	0	0	0	1	0	0	0	0	0	0	1	0	0	0	0	0	0	0	1	0	0	0	0
30	0	0	0	0	1	0	10	0	0	0	0	0	0	0	0	0	0	0	0	0	0	0	0	0	0	0	0	0	0	0	0	0	1	0	0	0	6	0	10	0	0	0	0	0	0	0	0	0	0
31	0	0	0	0	0	0	0	0	0	0	0	0	0	0	0	0	0	0	0	0	0	0	0	0	0	0	0	5	0	0	0	0	0	0	5	1	5	0	0	0	0	15	6	0	0	0	1	20	0
32	0	0	0	0	0	0	25	0	0	0	0	0	0	0	0	0	0	0	0	0	5	0	0	0	0	0	0	5	0	0	0	10	0	0	1	1	0	0	5	0	0	30	0	0	0	0	0	0	0
33	0	0	0	0	0	0	5	6	0	0	0	0	0	0	0	0	0	0	0	0	0	0	0	0	0	0	0	5	0	0	0	0	1	0	5	0	1	0	0	0	0	30	0	0	0	0	0	5	0
34	0	0	0	0	0	0	20	0	0	0	0	0	0	0	0	0	10	0	0	0	0	0	0	0	0	0	0	10	0	0	0	20	1	0	0	0	0	0	0	0	0	10	0	0	0	0	0	0	0
35	30	0	0	0	0	0	10	0	0	0	0	0	0	0	0	0	0	0	0	0	0	0	0	0	0	0	0	10	0	0	0	5	0	0	0	1	0	0	0	0	0	0	0	0	0	0	0	0	0
36	0	0	10	0	0	0	0	0	0	0	0	0	0	0	0	0	0	0	0	0	0	1	0	0	0	0	0	5	0	0	0	10	0	0	10	0	10	0	10	0	0	25	0	0	0	10	0	0	0
37	0	0	0	0	0	0	0	0	0	0	0	0	0	0	0	0	1	0	0	0	0	0	0	0	0	0	0	0	0	10	0	5	1	0	0	0	1	0	5	0	1	10	0	0	6	0	0	0	0
38	0	0	1	0	0	0	0	0	0	0	0	0	0	0	0	1	0	0	0	0	0	0	0	0	0	0	0	5	0	20	0	0	0	0	5	0	5	0	20	0	0	10	0	0	0	0	0	0	0
39	0	0	0	0	0	0	0	0	0	0	0	0	0	0	0	10	0	25	0	0	1	0	0	0	0	0	0	5	0	0	0	0	0	0	0	0	6	0	15	0	0	30	0	0	0	0	0	0	0
40	0	0	0	0	0	0	0	0	0	0	0	0	0	0	0	0	0	0	0	0	0	0	0	0	0	0	0	5	0	0	0	10	25	0	5	0	10	0	0	0	0	15	0	0	0	1	0	0	0
41	0	0	0	0	0	0	0	0	0	0	0	1	0	0	0	0	0	0	0	0	0	0	0	0	0	0	0	0	0	0	0	0	0	0	0	0	6	0	5	0	0	30	0	0	0	0	1	0	0
42	10	0	0	0	0	0	0	0	0	0	0	0	0	0	0	0	0	0	0	0	0	0	0	0	0	0	0	15	0	0	0	0	1	0	0	0	0	0	20	0	0	30	0	1	0	0	15	0	0
43	5	0	0	0	0	0	0	0	0	0	0	0	0	0	0	0	0	0	0	0	0	0	0	0	0	0	0	10	0	0	0	0	0	0	0	0	1	0	1	0	0	5	0	0	0	0	0	0	0
44	0	0	0	0	0	0	0	0	0	10	0	1	10	0	0	0	0	0	0	0	0	0	0	0	0	0	0	20	0	0	0	0	0	0	10	0	0	0	5	0	0	1	0	0	0	0	5	0	0
45	1	30	0	0	0	1	0	0	0	0	0	0	0	0	0	0	0	0	0	0	0	0	0	0	0	0	0	0	0	0	1	0	0	0	5	0	15	0	5	0	0	0	0	0	0	0	6	0	0
46	0	0	0	10	1	0	0	0	0	0	0	0	0	0	0	0	1	0	0	0	0	0	6	0	0	0	0	30	0	0	0	0	25	0	0	0	6	0	0	0	0	10	0	0	0	0	1	0	0
47	0	0	0	1	0	0	0	0	0	0	0	0	1	0	0	0	0	0	0	0	0	0	0	0	0	0	0	30	0	0	0	0	10	0	10	0	1	0	5	0	0	0	0	0	0	0	0	0	0
48	0	0	0	0	0	0	15	0	0	0	0	0	0	0	0	0	0	0	0	0	0	0	0	0	0	0	0	5	0	0	0	0	30	0	5	0	1	0	5	0	0	30	0	10	0	0	0	0	0
49	0	0	0	0	0	0	0	0	0	0	0	0	0	1	0	0	0	0	0	0	0	0	0	0	0	0	0	20	0	0	0	0	20	0	0	0	0	0	0	0	0	20	0	0	0	0	0	0	0
50	0	0	0	0	0	0	0	0	0	0	0	0	0	10	0	0	0	0	0	0	0	0	0	0	0	0	0	40	0	0	0	0	30	0	0	0	0	0	0	10	0	1	0	0	0	0	0	0	0
100	0	0	0	0	0	0	0	0	0	0	0	0	0	0	0	0	1	0	10	10	0	0	0	0	0	5	0	0	0	0	0	0	1	0	0	1	5	0	0	5	0	30	0	0	0	1	0	0	0
101	0	0	0	0	0	0	0	0	0	0	0	0	0	0	0	0	1	0	0	1	0	0	1	0	10	0	0	0	0	0	0	0	0	0	0	0	0	1	0	0	0	30	0	0	0	1	0	0	1
102	0	0	0	0	0	5	0	0	0	0	1	10	0	5	0	0	1	0	0	0	0	0	0	0	0	0	0	0	0	0	0	0	0	0	0	0	0	0	0	0	0	1	0	0	0	0	1	0	0
103	0	0	0	0	0	0	0	0	0	0	0	0	0	0	0	5	1	0	0	0	0	0	1	0	0	0	0	0	0	1	0	0	0	0	0	0	0	0	0	0	0	0	0	0	0	1	1	0	0
104	1	0	0	0	0	0	10	0	0	10	0	0	0	0	0	0	0	0	0	0	0	0	0	0	0	0	0	0	0	5	0	0	0	0	0	0	5	0	0	0	0	30	0	0	0	0	0	0	0
105	0	0	0	0	0	0	0	0	0	0	0	0	0	0	0	0	6	0	0	10	0	0	0	0	0	0	0	0	0	1	0	0	10	1	10	0	0	0	0	1	0	0	0	0	0	10	0	1	0
106	0	0	0	0	15	0	0	0	0	0	0	0	0	0	0	1	0	0	0	0	0	0	0	0	0	0	0	20	0	0	0	0	0	0	0	0	1	0	0	10	0	0	0	5	0	20	0	0	0
107	0	0	0	0	0	0	0	0	0	0	0	1	0	0	0	6	1	0	0	10	0	0	0	0	1	0	0	40	1	1	0	0	0	0	0	0	6	0	0	10	0	0	0	0	0	15	0	0	0
108	0	0	0	0	0	0	0	0	0	0	0	1	0	0	0	6	6	0	0	6	0	0	0	0	1	5	1	0	0	1	0	0	10	0	0	0	0	0	0	30	1	0	0	0	0	0	0	0	0
109	0	0	0	0	0	0	0	0	0	0	0	0	0	0	0	10	1	0	0	0	0	0	0	0	0	0	0	0	0	6	0	0	0	0	0	0	5	0	10	10	0	0	0	0	0	0	0	0	0
110	5	0	0	0	15	0	0	0	0	0	0	0	0	0	0	0	0	0	0	0	0	0	0	0	0	0	0	0	0	0	0	0	5	1	0	0	5	0	5	1	0	0	0	0	0	0	1	0	0
111	0	0	0	1	0	0	0	0	0	0	0	0	0	0	0	6	0	0	0	0	0	0	0	0	0	0	0	0	0	10	0	0	10	0	0	0	5	0	0	30	0	0	0	0	0	0	0	0	0
112	0	0	0	1	0	0	0	0	0	0	0	0	0	0	0	6	0	0	0	0	0	0	0	0	0	0	0	0	0	0	0	0	10	0	0	0	1	0	35	0	0	0	0	0	0	0	0	0	0
113	0	0	0	1	0	0	0	0	0	0	0	0	0	0	0	5	1	0	0	0	0	0	0	0	0	0	0	0	0	1	0	0	10	0	0	0	10	0	0	0	0	0	0	0	0	0	0	0	0
114	0	0	0	0	0	0	0	0	0	0	0	0	0	0	0	0	0	0	0	0	0	0	0	0	0	0	0	5	0	0	0	0	1	0	5	0	5	0	0	25	0	0	0	0	0	0	0	0	0
115	0	0	0	0	0	0	0	0	0	0	0	0	0	0	0	0	0	0	0	0	0	0	6	0	0	0	0	0	0	15	0	0	25	0	0	0	10	0	0	0	0	0	0	0	0	10	0	5	0
116	0	0	0	1	0	0	0	0	0	0	0	0	1	0	0	10	0	0	0	0	0	0	0	0	0	5	0	5	0	5	0	0	10	0	0	0	0	0	1	0	0	0	0	0	0	0	0	0	0
117	0	0	0	0	25	0	15	0	0	0	0	0	0	0	0	0	1	0	0	15	0	0	0	0	0	0	0	5	0	0	0	1	5	0	0	0	0	0	1	0	0	10	0	10	6	0	0	1	0
118	0	0	0	0	0	0	0	0	0	0	0	0	0	1	0	0	0	0	0	10	0	0	0	0	0	0	0	0	1	0	0	0	5	0	0	0	0	1	0	0	0	20	0	0	0	0	0	0	0
119	0	0	0	0	0	0	0	0	0	0	0	0	0	10	0	10	0	0	0	0	0	0	0	0	0	0	0	0	1	0	0	0	0	0	0	0	0	1	0	10	0	1	0	0	0	0	0	0	0
120	0	0	0	0	0	0	0	0	0	0	0	10	0	0	0	0	1	0	0	0	0	0	0	0	0	0	0	0	0	1	0	0	10	0	0	0	5	1	0	0	0	0	0	0	0	0	0	0	0
121	0	0	1	0	0	0	5	0	0	0	0	1	0	1	1	0	0	0	0	0	0	0	0	0	0	0	0	0	0	6	0	0	30	0	0	0	25	6	0	0	0	0	0	0	0	0	1	0	0
122	0	0	0	0	0	0	5	0	0	0	0	0	10	0	0	0	1	0	0	0	0	1	0	0	0	1	0	0	0	1	0	0	30	0	0	0	0	0	10	0	0	20	0	0	0	0	5	1	0
123	0	0	10	0	0	0	0	0	0	0	0	0	0	1	10	0	1	0	0	0	10	0	0	0	0	0	0	0	0	10	0	0	15	1	0	0	10	1	0	0	0	10	0	0	0	0	1	0	0
124	0	0	0	0	0	0	0	0	0	0	0	1	1	0	0	0	0	0	0	0	0	0	0	0	0	10	0	15	0	0	0	0	10	0	0	0	0	0	1	0	0	0	0	0	0	0	0	0	0
125	5	0	0	0	10	0	1	0	0	0	0	0	0	0	0	0	0	0	0	0	0	0	0	0	0	0	0	0	0	10	0	0	0	0	0	0	25	0	1	0	0	0	0	0	10	10	1	5	0
126	0	0	0	0	1	0	10	0	0	0	0	0	0	0	0	0	1	0	0	0	0	0	0	0	0	5	0	0	0	0	0	0	0	0	0	0	1	0	10	0	1	0	0	0	0	1	0	0	0
127	0	0	0	0	1	0	0	0	0	0	0	0	1	0	0	0	0	0	0	0	15	0	0	0	0	0	0	0	0	5	0	0	10	0	0	0	0	0	0	0	0	0	0	0	0	5	0	0	0
128	0	0	0	0	0	0	5	0	0	0	0	0	1	0	0	0	0	0	0	0	10	0	0	0	0	5	0	0	0	1	0	0	0	0	0	0	1	0	0	0	0	0	0	0	1	0	0	0	0
129	0	0	0	0	1	0	10	0	0	0	0	0	10	10	5	0	0	0	0	0	0	0	0	0	0	5	0	0	0	0	0	0	1	0	0	0	6	0	10	0	0	0	0	0	0	1	0	0	0
130	0	0	0	0	0	0	0	0	0	1	0	0	0	0	0	0	0	0	0	0	0	0	0	0	0	0	0	0	0	20	0	0	5	0	0	0	5	0	0	0	0	15	5	0	0	0	6	20	0
131	0	0	0	0	0	5	25	0	0	0	0	0	0	1	5	0	0	0	0	0	0	0	0	0	0	0	0	0	0	1	0	10	0	0	0	0	0	0	0	0	0	30	0	0	0	0	0	0	0
132	0	0	0	0	0	0	10	0	0	0	0	0	0	5	5	0	0	0	0	0	0	0	0	0	0	0	0	0	0	5	0	0	0	0	0	1	5	0	0	0	0	30	0	0	0	0	0	0	0
133	0	0	0	0	0	1	10	0	0	0	0	0	0	5	5	0	10	0	0	0	0	0	0	0	0	0	0	0	0	0	0	5	0	0	0	0	0	0	0	0	0	10	0	0	0	0	0	0	0
134	5	0	0	0	0	1	30	0	0	0	0	0	0	15	0	0	5	0	0	0	0	0	0	0	0	0	0	5	0	1	0	0	0	0	0	0	1	0	0	0	0	0	0	0	0	0	0	0	0
135	0	0	10	0	0	0	0	0	0	0	0	0	0	0	0	0	0	0	0	0	0	0	0	0	0	0	0	5	0	0	0	0	0	0	0	0	1	0	20	0	0	30	0	0	0	1	0	0	0
136	0	0	0	1	0	0	0	0	0	0	0	0	0	0	0	0	1	0	0	0	0	0	0	0	0	0	0	1	0	20	0	0	5	0	0	0	10	0	20	0	0	10	0	0	0	0	0	0	0
137	0	0	1	0	0	0	0	0	0	0	0	0	0	0	0	1	0	0	0	0	0	0	0	0	0	0	0	1	0	20	0	0	5	0	0	0	5	0	20	0	0	10	0	0	0	0	0	0	0
138	0	0	0	0	0	0	0	0	0	0	0	0	0	0	0	10	0	25	0	0	0	0	0	0	0	0	0	5	0	0	0	0	1	0	0	0	6	0	30	0	0	30	0	0	0	0	0	0	0
139	0	0	0	0	0	0	0	0	0	0	0	1	0	0	0	0	0	0	0	0	0	0	0	0	0	10	0	10	0	0	0	10	25	0	0	0	1	0	0	0	0	10	0	0	0	1	0	0	0
140	0	0	0	0	0	30	15	0	0	0	0	1	0	0	0	0	0	0	0	0	0	0	0	0	0	0	0	0	0	0	0	0	0	0	0	0	6	0	0	0	0	20	0	0	0	0	1	0	0
141	0	0	0	0	0	0	0	0	0	0	0	0	0	0	0	0	0	0	0	0	0	0	0	0	0	0	0	0	0	0	0	0	10	0	0	0	0	0	0	0	0	30	0	1	0	0	15	1	0
142	0	0	0	0	0	1	10	0	0	0	0	0	0	0	0	0	0	0	0	0	0	0	0	0	0	0	0	0	0	0	0	0	1	0	0	0	0	0	20	0	0	20	0	1	0	0	15	1	0
143	0	0	0	0	0	30	5	0	0	0	0	0	15	5	0	0	0	0	0	0	0	0	0	0	0	5	0	0	0	0	0	0	0	0	0	0	0	0	0	0	0	1	0	0	0	0	1	0	0
144	0	0	0	0	0	5	5	1	0	0	0	0	1	0	0	0	0	0	0	0	0	0	0	0	0	1	0	0	0	0	1	0	0	0	0	0	15	0	0	0	0	0	0	0	0	0	6	0	0
145	0	0	0	1	0	0	0	0	0	0	0	0	0	0	0	1	1	0	0	0	0	0	6	0	0	0	0	30	0	0	0	0	5	0	0	0	6	0	0	0	0	15	0	0	0	0	1	0	0
146	0	0	0	10	0	0	0	0	0	0	0	0	0	0	0	10	0	0	0	0	0	0	0	0	0	0	0	60	0	1	0	0	10	0	0	0	1	0	0	0	0	1	0	0	0	0	0	0	0
147	0	0	0	0	0	0	15	0	0	1	0	0	0	0	0	0	0	0	0	0	0	0	0	0	0	0	0	10	0	0	0	0	20	0	0	0	1	0	0	0	0	30	0	10	0	0	0	0	0
148	0	0	0	0	0	0	0	0	0	0	0	0	0	1	0	0	0	0	0	0	0	0	0	0	0	0	0	1	0	0	0	0	20	0	0	0	0	0	0	0	0	20	0	0	0	0	0	0	0
149	0	0	0	0	0	0	5	0	0	0	0	1	1	10	0	10	0	0	0	0	0	0	0	0	0	0	0	60	0	0	0	0	5	0	0	0	0	0	0	10	0	1	0	0	0	0	0	0	0
[truncated: 63 more columns]

## Sheet: environmental_descriptors
Transect_ID	Grassland_ID	Administrative_unit_name	Transect_location	Grassland_type
1	A	Gorka_Stogniowska	inside	Control
2	A	Gorka_Stogniowska	25_field	Control
3	A	Gorka_Stogniowska	field_boundary	Control
4	A	Gorka_Stogniowska	25_verge	Control
5	A	Gorka_Stogniowska	verge	Control
6	B	Rzedowice	inside	Control
7	B	Rzedowice	25_field	Control
8	B	Rzedowice	field_boundary	Control
9	B	Rzedowice	25_verge	Control
10	B	Rzedowice	verge	Control
11	C	Grabie	verge	Control
12	C	Grabie	25_field	Control
13	C	Grabie	field_boundary	Control
14	C	Grabie	25_verge	Control
15	C	Grabie	inside	Control
16	D	Szarbia	inside	Control
17	D	Szarbia	25_field	Control
18	D	Szarbia	field_boundary	Control
19	D	Szarbia	25_verge	Control
20	D	Szarbia	verge	Control
21	E	Zaczarnie	inside	Control
22	E	Zaczarnie	25_field	Control
23	E	Zaczarnie	field_boundary	Control
24	E	Zaczarnie	25_verge	Control
25	E	Zaczarnie	verge	Control
26	F	Czulice	inside	Control
27	F	Czulice	25_field	Control
28	F	Czulice	field_boundary	Control
29	F	Czulice	verge	Control
30	F	Czulice	25_verge	Control
31	G	Jadowniki	inside	Control
32	G	Jadowniki	25_field	Control
33	G	Jadowniki	field_boundary	Control
34	G	Jadowniki	25_verge	Control
35	G	Jadowniki	verge	Control
36	H	Dabrowka_Gorzycka	inside	Control
37	H	Dabrowka_Gorzycka	verge	Control
38	H	Dabrowka_Gorzycka	field_boundary	Control
39	H	Dabrowka_Gorzycka	25_verge	Control
40	H	Dabrowka_Gorzycka	25_field	Control
41	I	Barczkow	inside	Control
42	I	Barczkow	25_field	Control
43	I	Barczkow	field_boundary	Control
44	I	Barczkow	25_verge	Control
45	I	Barczkow	verge	Control
46	J	Bessow	verge	Control
47	J	Bessow	inside	Control
48	J	Bessow	25_verge	Control
49	J	Bessow	field_boundary	Control
50	J	Bessow	25_field	Control
100	K	Wierzbno	inside	Road
101	K	Wierzbno	25_field	Road
102	K	Wierzbno	field_boundary	Road
103	K	Wierzbno	25_verge	Road
104	K	Wierzbno	verge	Road
105	L	Rudno_Gorne	verge	Road
106	L	Rudno_Gorne	25_verge	Road
107	L	Rudno_Gorne	field_boundary	Road
108	L	Rudno_Gorne	inside	Road
109	L	Rudno_Gorne	25_field	Road
110	M	Stregoborzyce	verge	Road
111	M	Stregoborzyce	inside	Road
112	M	Stregoborzyce	25_verge	Road
113	M	Stregoborzyce	25_field	Road
114	M	Stregoborzyce	field_boundary	Road
115	N	Niegardow	verge	Road
116	N	Niegardow	inside	Road
117	N	Niegardow	25_verge	Road
118	N	Niegardow	25_field	Road
119	N	Niegardow	field_boundary	Road
120	O	Wola_Zabierzowska	field_boundary	Road
121	O	Wola_Zabierzowska	25_verge	Road
122	O	Wola_Zabierzowska	inside	Road
123	O	Wola_Zabierzowska	verge	Road
124	O	Wola_Zabierzowska	25_field	Road
125	P	Strzelce_Male	verge	Road
126	P	Strzelce_Male	field_boundary	Road
127	P	Strzelce_Male	25_verge	Road
128	P	Strzelce_Male	25_field	Road
129	P	Strzelce_Male	inside	Road
130	Q	Stare_Zukowice	verge	Road
131	Q	Stare_Zukowice	field_boundary	Road
132	Q	Stare_Zukowice	25_verge	Road
133	Q	Stare_Zukowice	25_field	Road
134	Q	Stare_Zukowice	inside	Road
135	R	Gleboka	field_boundary	Road
136	R	Gleboka	verge	Road
137	R	Gleboka	25_verge	Road
138	R	Gleboka	25_field	Road
139	R	Gleboka	inside	Road
140	S	Wronin	field_boundary	Road
141	S	Wronin	verge	Road
142	S	Wronin	25_verge	Road
143	S	Wronin	25_field	Road
144	S	Wronin	inside	Road
145	T	Wola_Przemykowska	field_boundary	Road
146	T	Wola_Przemykowska	verge	Road
147	T	Wola_Przemykowska	25_verge	Road
148	T	Wola_Przemykowska	25_field	Road
149	T	Wola_Przemykowska	inside	Road

## Sheet: roadkilled_butterflies
Grassland_ID	Papilio machaon	Pieris rapae	Anthocaris cardamines	Pieris brassicae	Pieris napi	Colias hyale	Gonepteryx rhamni	Callophrys rubi	Lycaena phlaeas	Lycaena virgaureae	Lycaena tityrus	Phengaris teleius	Phengaris nausithous	Celastrina argiolus	Plebeius argyrognomon	Leptidea reali	Polyommatus icarus	Polyommatus coridon	Araschnia levana	Vanessa atalanta	Inachis io	Vanessa cardui	Nymphalis antiopa	Polygonia c-album	Aglais urticae	Argynnis paphia	Argynnis aglaja	Issoria latonia	Brenthis ino	Boloria dia	Melithea athalia	Lassiomata megera	Melanargia galathea	Maniola jurtyna	Aphantopus hyperantus	Coenonympha pamphilus	Coenonympha glycerion	Pyrgus malvae	Erynnis tages	Thymelicus lineola	Thymelicus sylvestris	Ochlodes sylvanus
K	0	2	0	0	0	1	0	0	0	0	0	1	0	0	1	0	4	1	0	0	1	0	0	0	1	0	0	0	0	0	0	0	0	0	4	0	0	0	0	1	0	2
L	0	1	0	0	2	0	1	0	0	0	1	0	0	0	0	0	0	0	0	0	1	0	0	0	1	0	0	1	0	1	0	0	0	1	1	1	0	0	0	0	0	0
M	0	4	3	0	1	0	0	0	0	0	0	0	0	0	0	0	0	0	0	0	2	0	0	0	0	0	0	4	0	0	0	0	0	0	0	0	0	0	0	2	0	0
N	0	1	0	0	2	0	0	0	1	0	0	0	0	0	0	0	0	0	0	0	0	0	0	0	3	0	0	2	0	0	0	2	2	2	3	3	0	0	0	0	0	0
O	1	0	2	2	0	0	0	1	3	0	0	0	2	0	0	0	3	0	0	0	0	0	0	0	0	0	0	0	0	0	0	0	0	0	2	0	0	0	0	0	0	0
P	0	0	0	4	3	0	0	0	0	0	0	0	0	0	0	0	1	0	0	0	2	0	0	0	0	0	0	1	0	0	1	0	0	0	0	4	0	0	1	0	0	1
Q	0	2	1	0	0	0	0	0	0	0	0	0	0	0	0	0	0	0	1	1	0	0	0	0	0	0	0	0	0	0	0	0	0	0	0	0	1	0	0	0	0	0
R	1	0	0	0	2	0	0	0	0	0	1	1	2	0	1	0	0	0	0	0	0	0	0	0	1	0	0	0	1	1	0	0	0	0	3	1	0	0	0	0	0	1
S	0	1	2	2	1	0	1	0	0	0	0	0	0	0	0	0	0	0	1	0	0	0	0	0	0	0	0	0	0	0	0	1	0	0	0	0	0	0	1	0	1	1
T	0	4	0	1	1	0	0	0	0	0	0	1	1	0	0	1	2	0	0	1	0	0	0	0	0	0	0	0	0	0	0	0	0	1	0	4	0	0	1	0	0	0

## Sheet: Explanations
Transect_ID	unique identifier of a transect
Grassland_ID	unique identifier of a grassland patch
Administrative_unit_name	a village where a grassland is located
Transect_location	a location of a transect withina a grassland patch
Grassland_type	grassland type, two levels: Road - grasslands located at roads, Control - grasslands located far from roads
